# Supplementary material for: Ambient measurements of biological aerosol particles near Killarney, Ireland: a comparison between real-time fluorescence and microscopy techniques
Source: Copernicus journal article supplement (doi:10.5194/acp-14-8055-2014), 2014-08-13
Supplement: Supplementary file 1 [file acp-14-8055-2014-supplement.pdf]

Supplement of Atmos. Chem. Phys., 14, 8055–8069, 2014  
<http://www.atmos-chem-phys.net/14/8055/2014/>  
doi:10.5194/acp-14-8055-2014-supplement  
© Author(s) 2014. CC Attribution 3.0 License.

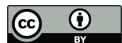

Atmospheric  
Chemistry  
and Physics  
Open Access

The logo for the journal, featuring the letters 'E' and 'G' intertwined within a circular frame.

*Supplement of*

## **Ambient measurements of biological aerosol particles near Killarney, Ireland: a comparison between real-time fluorescence and microscopy techniques**

**D. A. Healy et al.**

*Correspondence to:* D. A. Healy (d.healy@ucc.ie) and J. A. Huffman (alex.huffman@du.edu)

**Table S1.** The size bin parameters shown for 52 particle size bins used to classify particle size data as measured by WIBS-4 and UV-APS.  $D_{o(\text{median})}$  shows the geometric median value of the upper and  $D_{o(\text{lower limit})}$  shows lower range for optical particle diameter of each size bin. Bins are matched to UV-APS bins, as discussed in Supplemental Table S1 in Huffman et al. (2010).

**References:**

Huffman, J. A., Treutlein, B. and Pöschl, U.: Fluorescent biological aerosol particle concentrations and size distributions measured with an Ultraviolet Aerodynamic Particle Sizer (UV-APS) in Central Europe, *Atmospheric Chemistry and Physics*, 10, 3215-3233, 2010.

| Channel # | $D_{o(\text{median})}$ ( $\mu\text{m}$ ) | $D_{o(\text{lower limit})}$ ( $\mu\text{m}$ ) |
|-----------|------------------------------------------|-----------------------------------------------|
| 1         | 0.542                                    | 0.523                                         |
| 2         | 0.583                                    | 0.562                                         |
| 3         | 0.626                                    | 0.604                                         |
| 4         | 0.673                                    | 0.649                                         |
| 5         | 0.723                                    | 0.697                                         |
| 6         | 0.777                                    | 0.749                                         |
| 7         | 0.835                                    | 0.805                                         |
| 8         | 0.898                                    | 0.865                                         |
| 9         | 0.965                                    | 0.93                                          |
| 10        | 1.037                                    | 0.999                                         |
| 11        | 1.114                                    | 1.074                                         |
| 12        | 1.197                                    | 1.154                                         |
| 13        | 1.286                                    | 1.24                                          |
| 14        | 1.382                                    | 1.333                                         |
| 15        | 1.486                                    | 1.432                                         |
| 16        | 1.596                                    | 1.539                                         |
| 17        | 1.715                                    | 1.654                                         |
| 18        | 1.843                                    | 1.777                                         |
| 19        | 1.981                                    | 1.91                                          |
| 20        | 2.129                                    | 2.052                                         |
| 21        | 2.288                                    | 2.205                                         |
| 22        | 2.458                                    | 2.37                                          |
| 23        | 2.642                                    | 2.547                                         |
| 24        | 2.839                                    | 2.737                                         |
| 25        | 3.051                                    | 2.941                                         |
| 26        | 3.278                                    | 3.16                                          |
| 27        | 3.523                                    | 3.396                                         |
| 28        | 3.786                                    | 3.65                                          |
| 29        | 4.068                                    | 3.924                                         |
| 30        | 4.371                                    | 4.217                                         |
| 31        | 4.698                                    | 4.532                                         |
| 32        | 5.048                                    | 4.87                                          |
| 33        | 5.425                                    | 5.233                                         |
| 34        | 5.829                                    | 5.623                                         |
| 35        | 6.264                                    | 6.043                                         |
| 36        | 6.732                                    | 6.494                                         |
| 37        | 7.234                                    | 6.978                                         |
| 38        | 7.774                                    | 7.499                                         |
| 39        | 8.354                                    | 8.059                                         |
| 40        | 8.977                                    | 8.66                                          |
| 41        | 9.647                                    | 9.306                                         |
| 42        | 10.37                                    | 10.002                                        |
| 43        | 11.14                                    | 10.748                                        |
| 44        | 11.97                                    | 11.548                                        |
| 45        | 12.86                                    | 12.402                                        |
| 46        | 13.82                                    | 13.338                                        |
| 47        | 14.86                                    | 14.332                                        |
| 48        | 15.96                                    | 15.4                                          |
| 49        | 17.15                                    | 16.539                                        |
| 50        | 18.43                                    | 17.773                                        |
| 51        | 19.81                                    | 19.099                                        |
| 52        | 20                                       | —                                             |

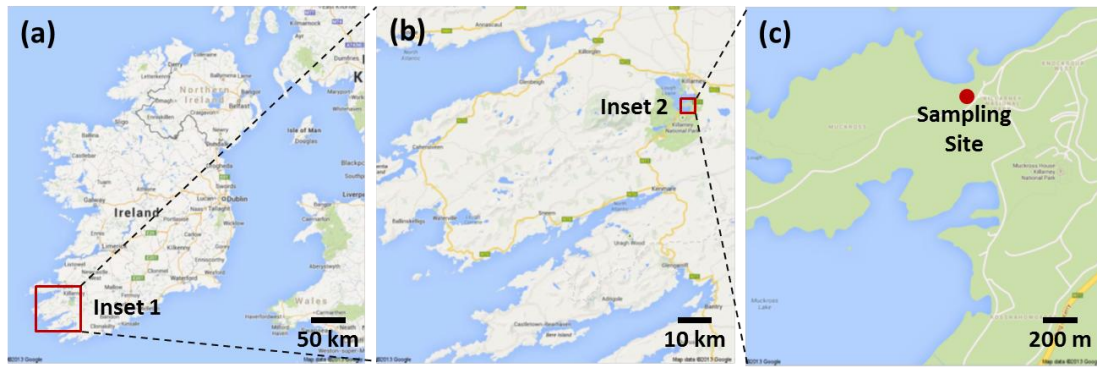

**Figure S1.** Location of sampling site in Killarney National Park, Ireland shown in three successive zoom levels. Red boxes in (a) and (b) show area of zoom for plot immediately to right. Approximate scale bars are shown in lower right of each panel. Sampling location shown as red dot in panel (c): N 52°01.263' W 09°30.553'. Map data copyright Google, 2013.

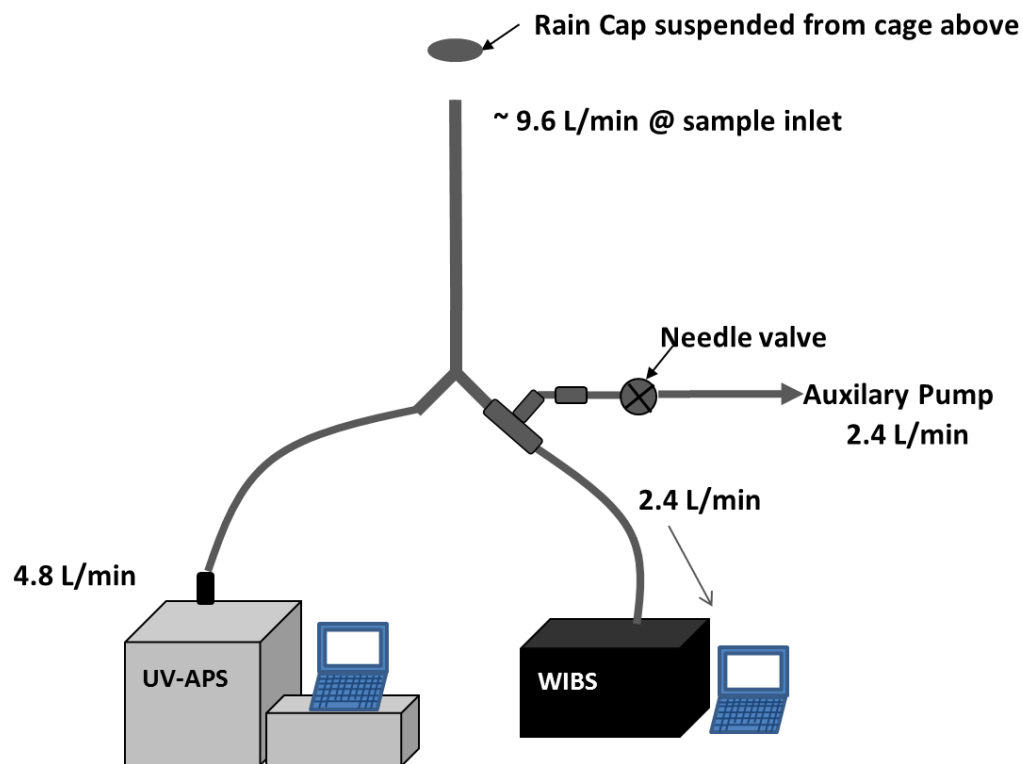

**Figure S2.** Schematic diagram of sample inlet design, with corresponding flow rates on each line.

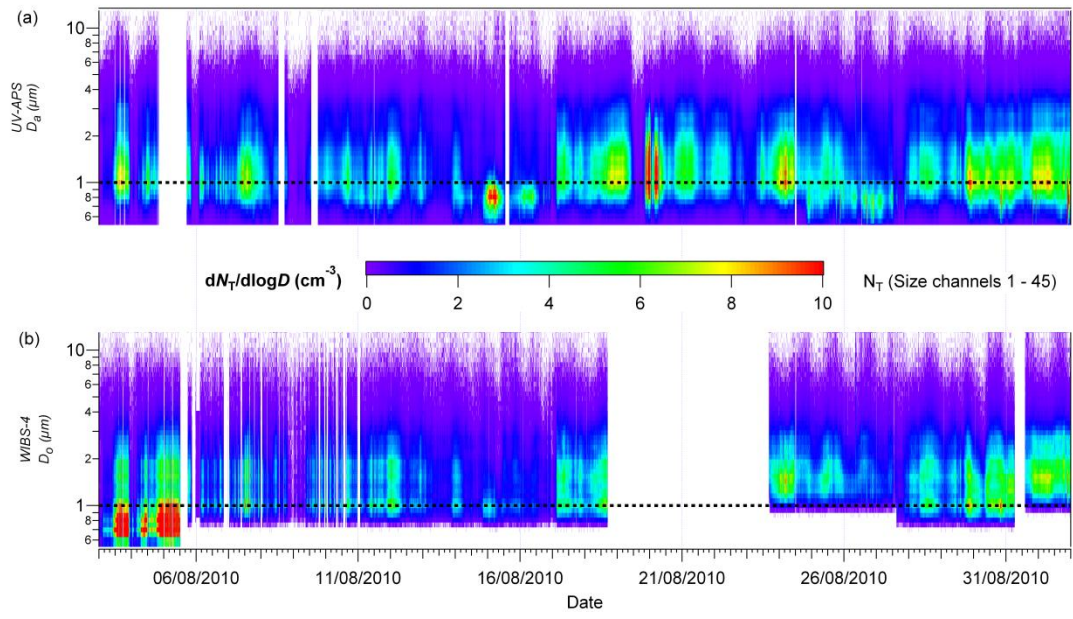

**Figure S3.** Size-resolved total particle number ( $N_T$ ) concentrations as measured by: (a) UV-APS and (b) WIBS-4. Colour-scale shows number concentration as  $dN_T/d\log D$ . UV-APS particle size reported in aerodynamic diameter ( $D_a$ ) and WIBS-4 particle size reported in optical diameter ( $D_o$ ). Dashed black line at 1  $\mu\text{m}$  shows the point above which coarse particle number was integrated.

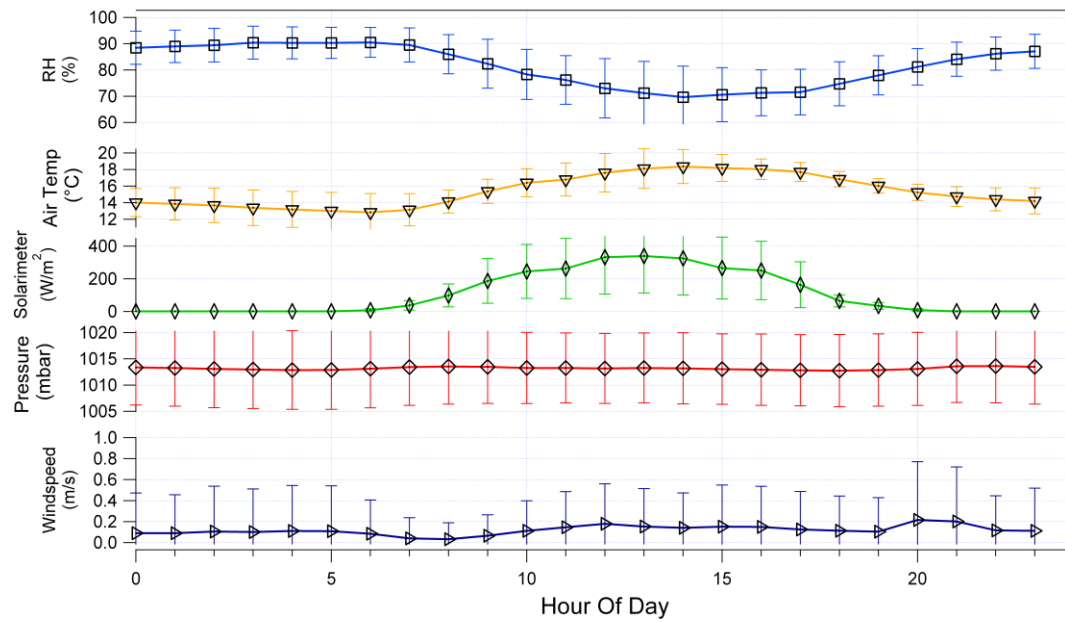

**Figure S4.** Diurnal trends of meteorological data averaged over entire measurement period. Symbols are mean values and bars are  $\pm 1$  standard deviation. Shown are: relative humidity (%), air temperature ( $^{\circ}\text{C}$ ), down-welling solar radiation ( $\text{W m}^{-2}$ ), atmospheric pressure (mbar), and wind speed ( $\text{m s}^{-1}$ ).
